# Supplementary material for: Dual Origins of Dairy Cattle Farming – Evidence from a Comprehensive Survey of European Y-Chromosomal Variation
Source: PubMed Central journal article supplement (PMC3016991; doi:10.1371/journal.pone.0015922), 2011-01-06
Supplement: pone.0015922.s001.pdf [file pone.0015922.s001.pdf]

(a)

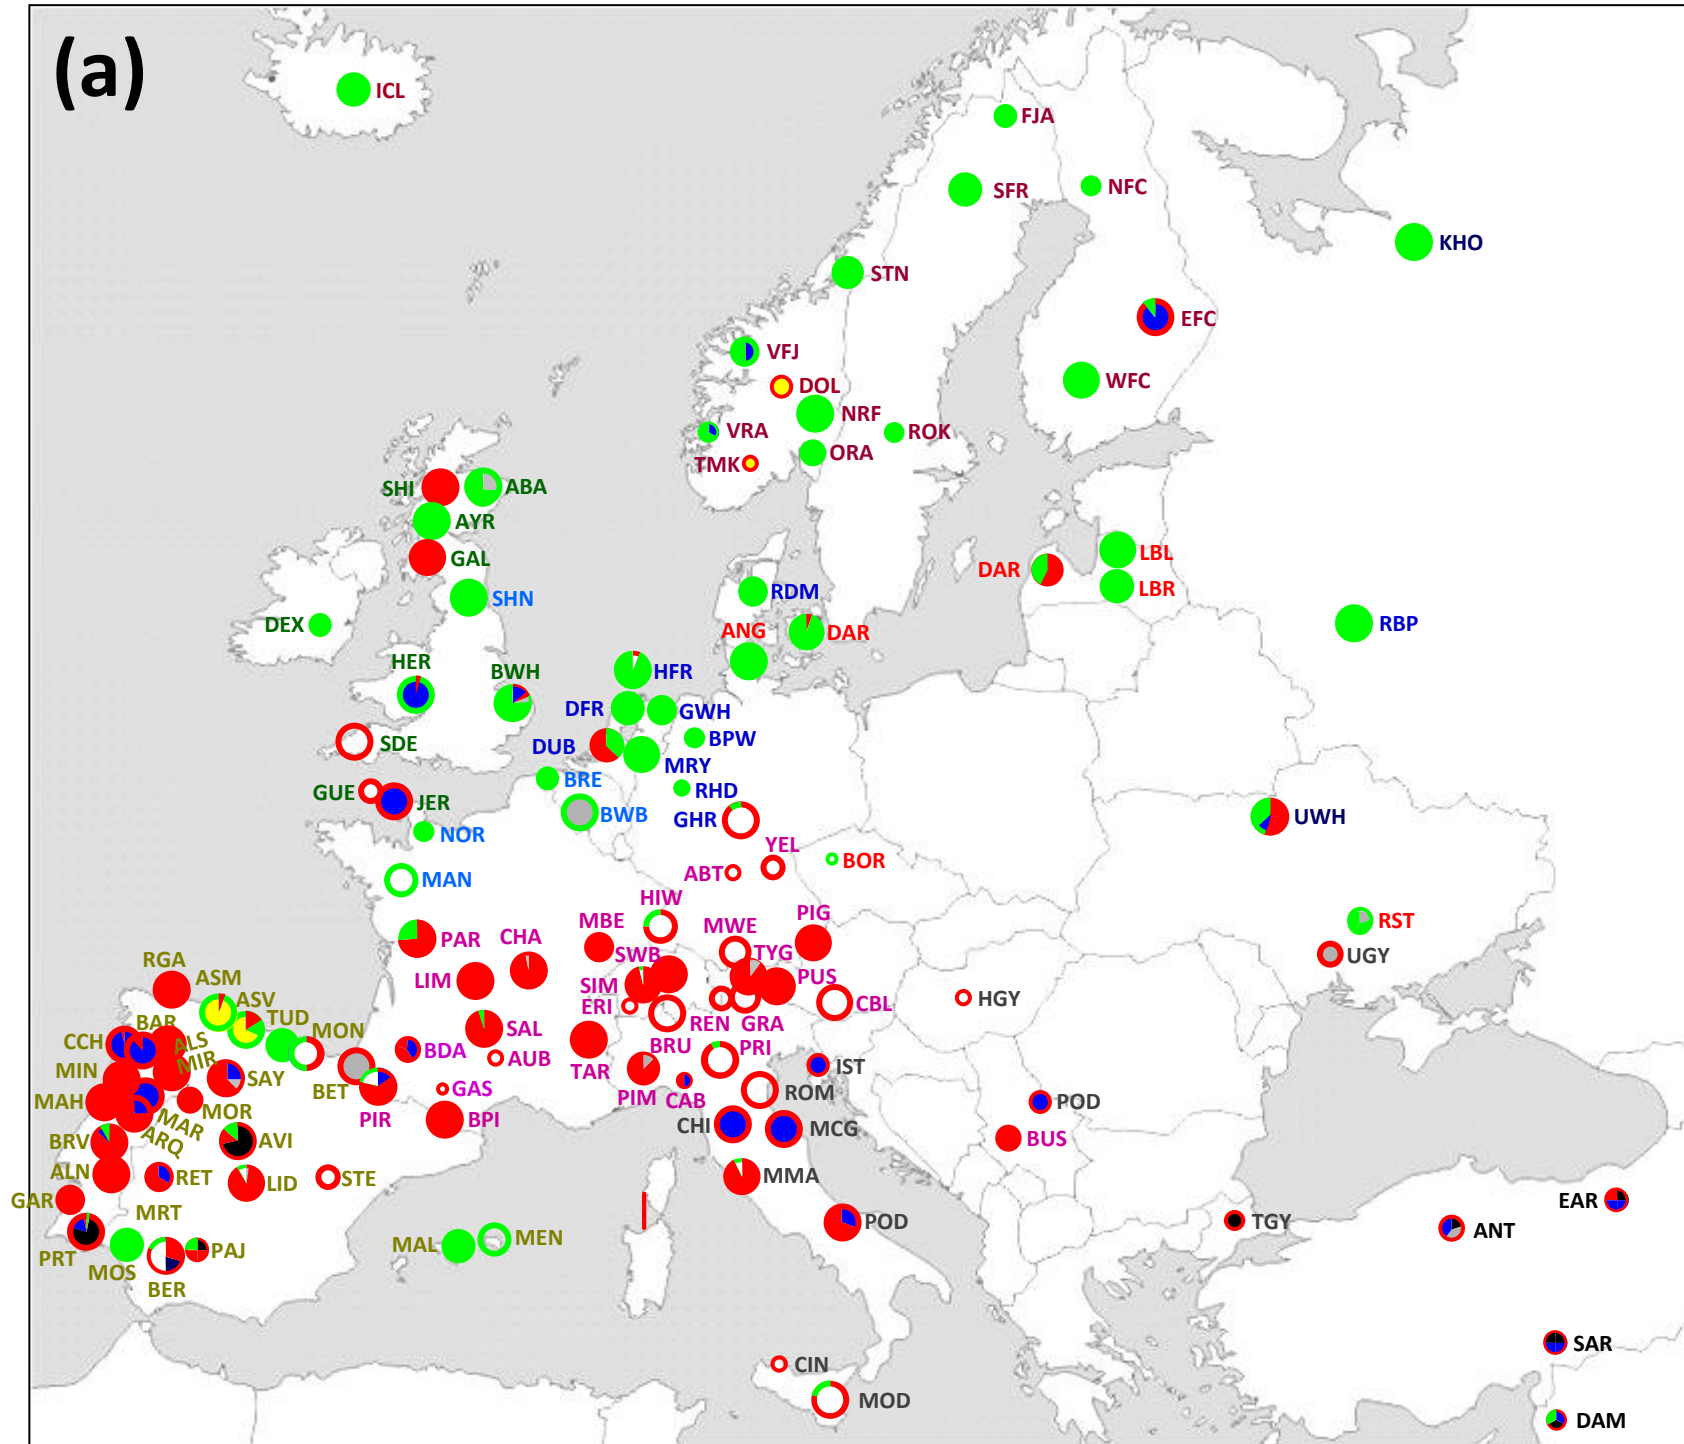

(b)

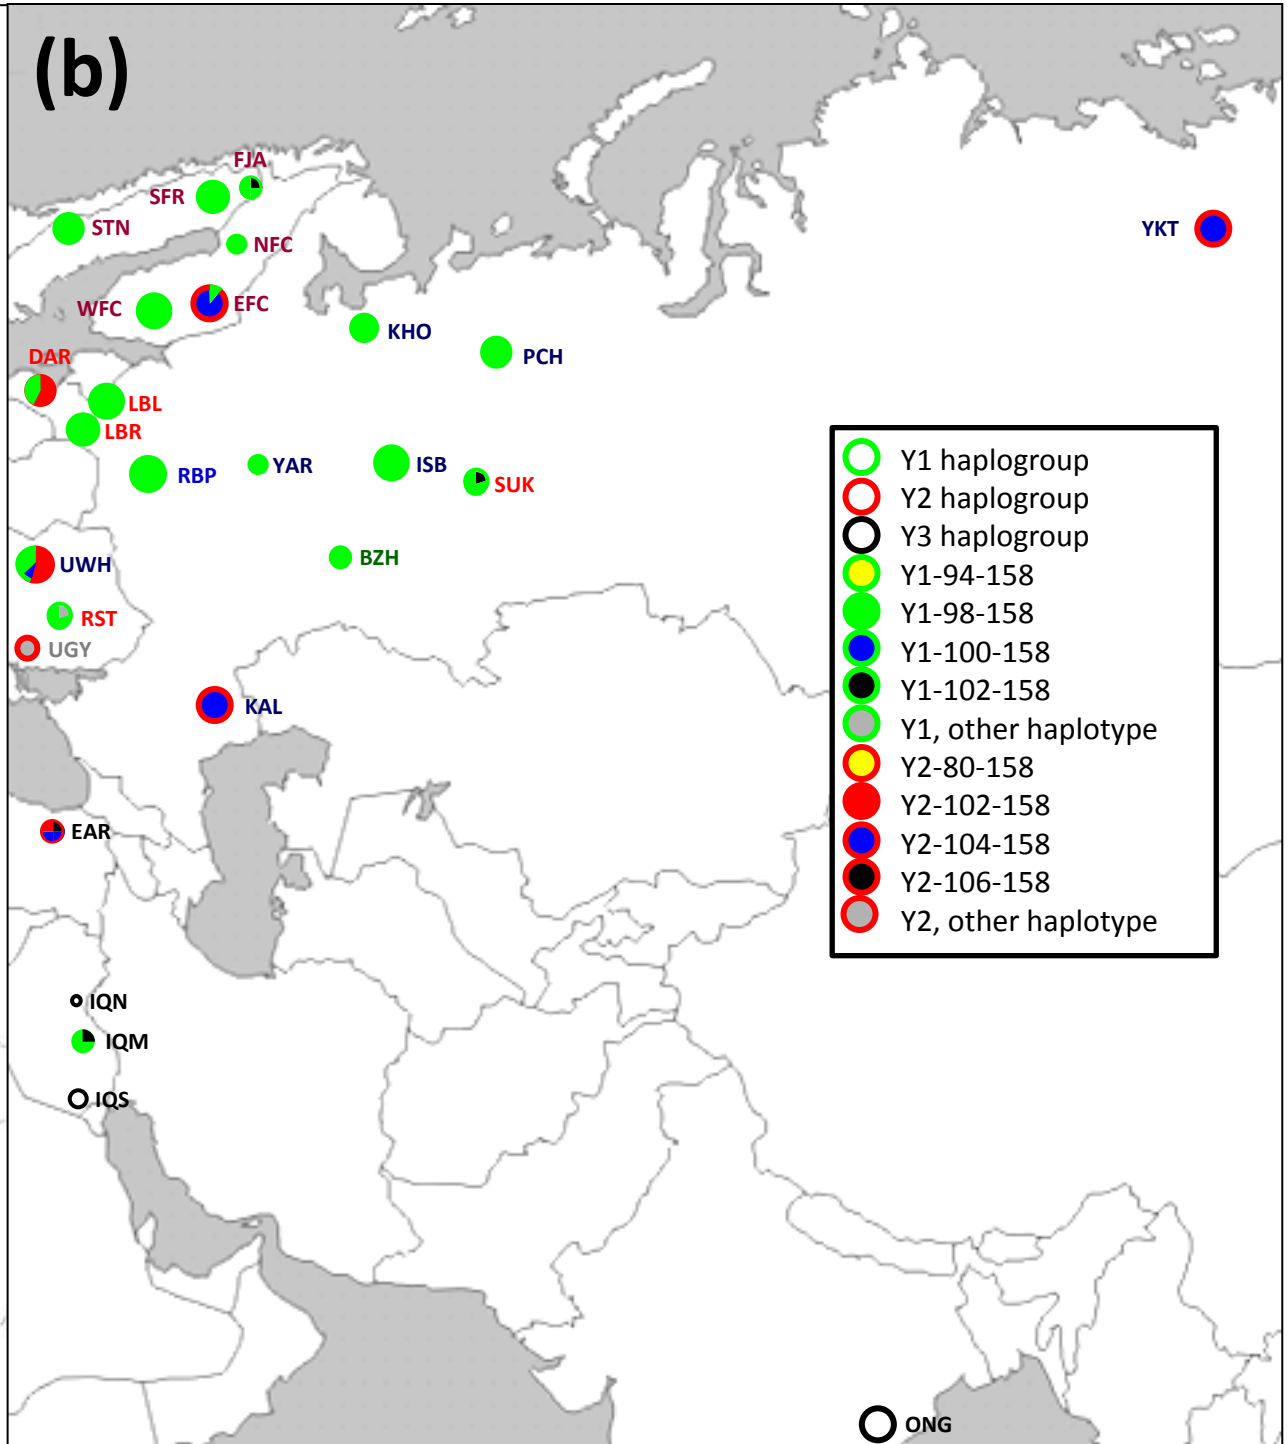

- Y1 haplogroup
- Y2 haplogroup
- Y3 haplogroup
- Y1-94-158
- Y1-98-158
- Y1-100-158
- Y1-102-158
- Y1, other haplotype
- Y2-80-158
- Y2-102-158
- Y2-104-158
- Y2-106-158
- Y2, other haplotype

○ ONG
