# Supplementary material for: Dual Origins of Dairy Cattle Farming – Evidence from a Comprehensive Survey of European Y-Chromosomal Variation
Source: PubMed Central journal article supplement (PMC3016991; doi:10.1371/journal.pone.0015922), 2011-01-06

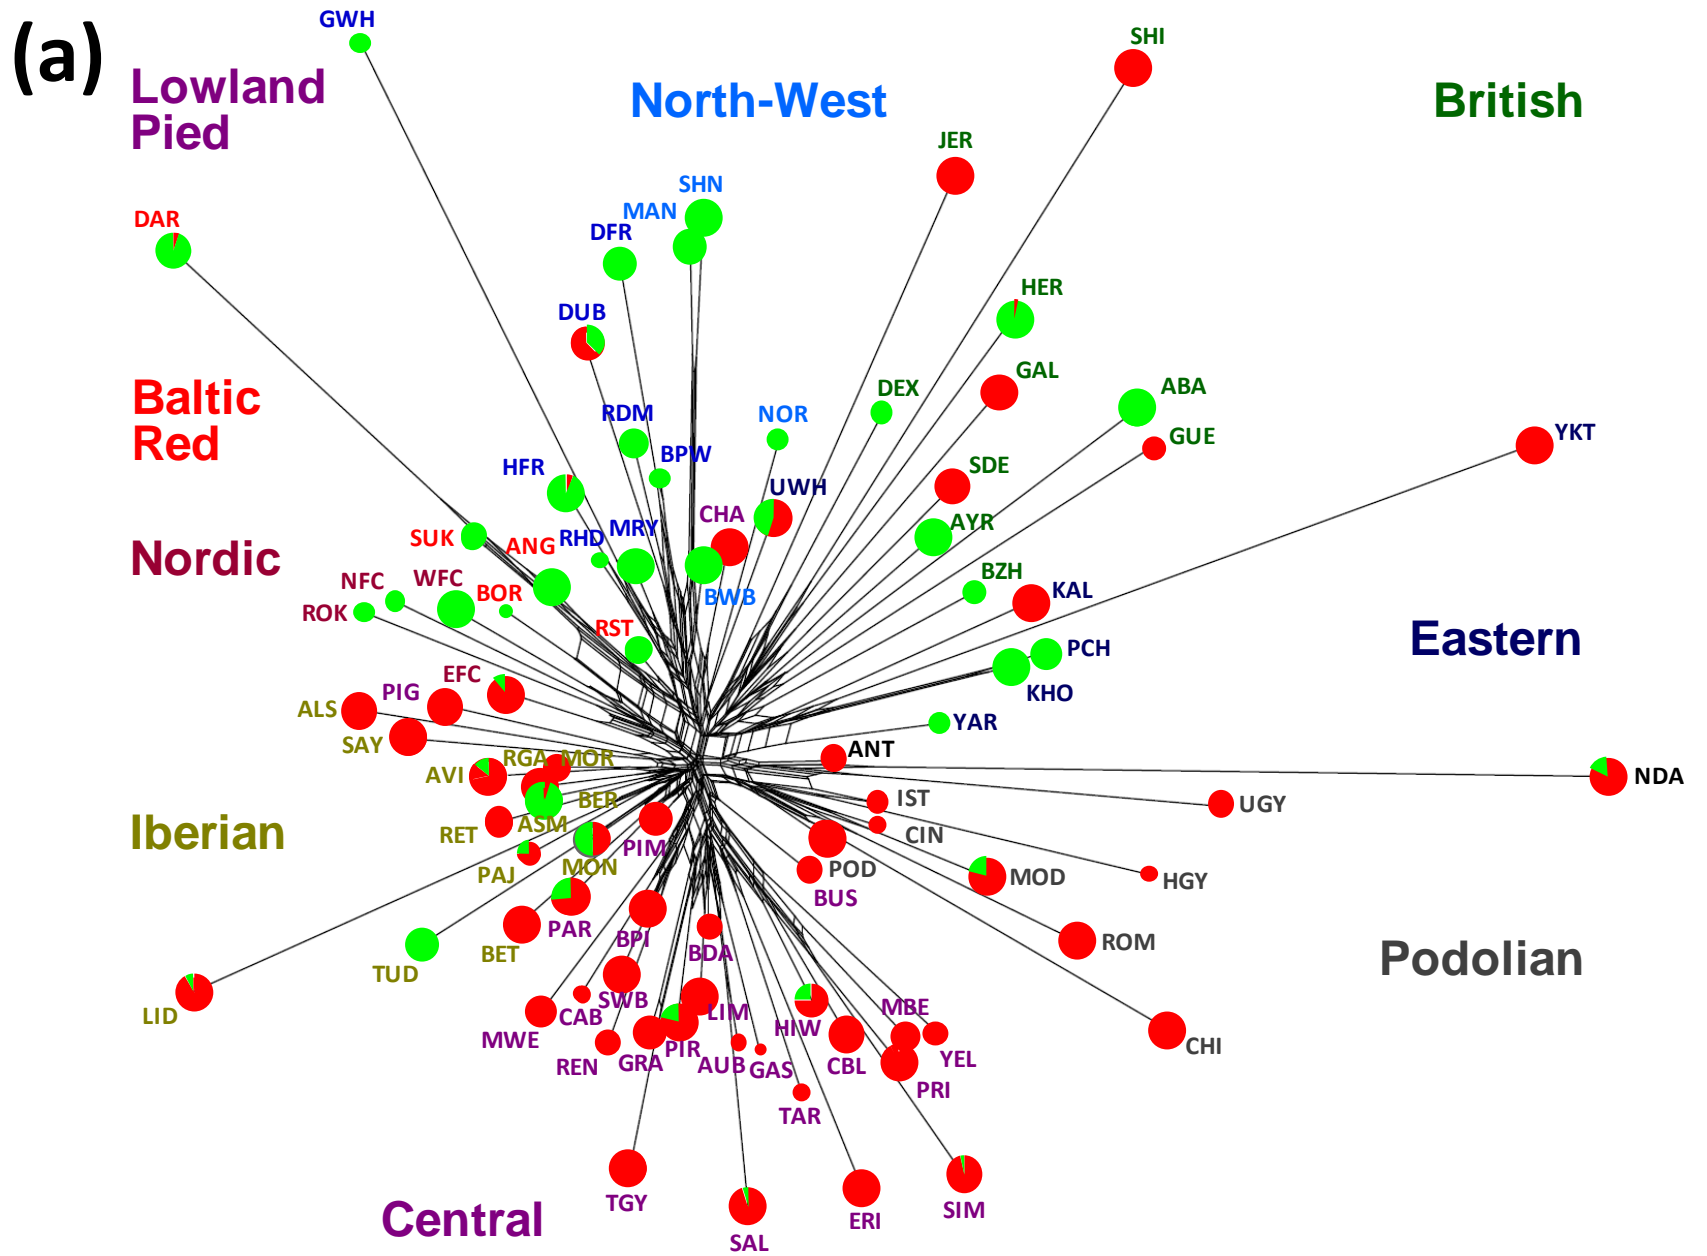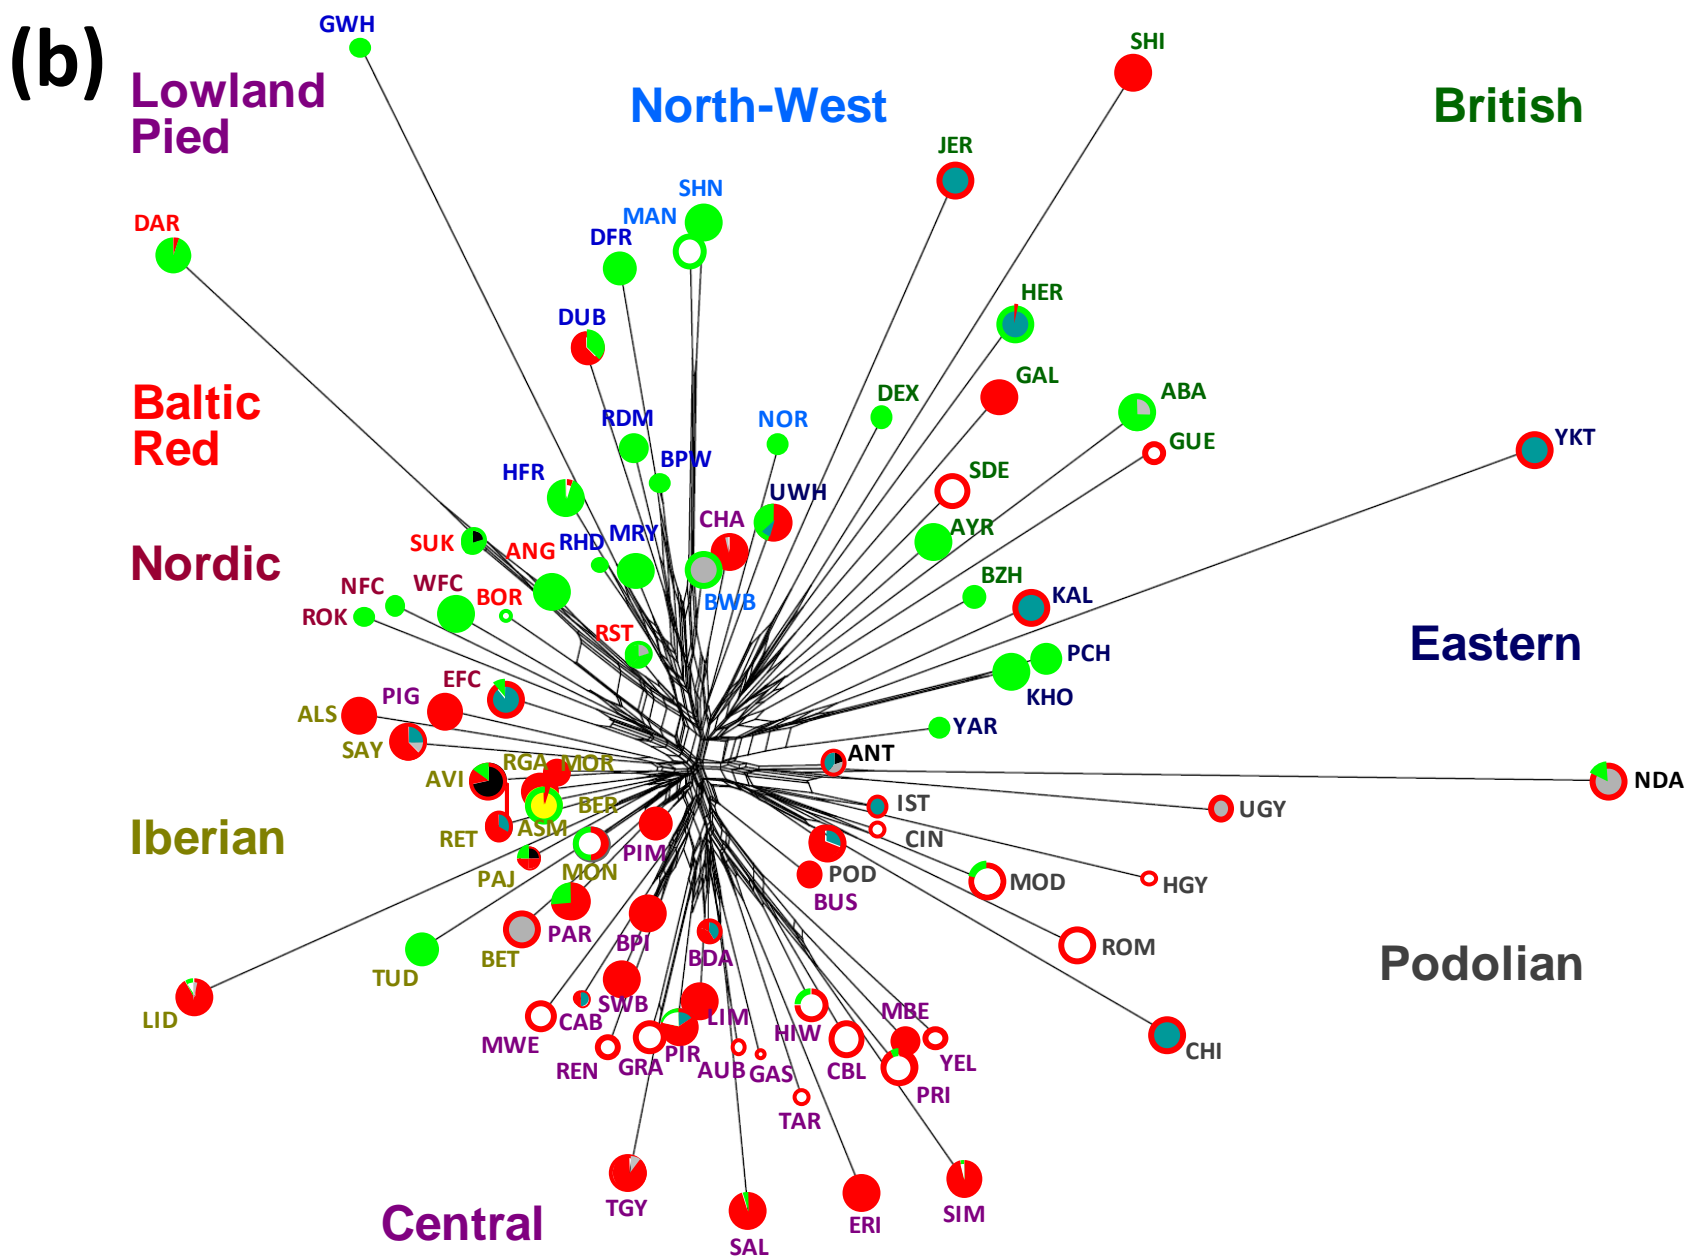

Supplement: pone.0015922.s002.pdf [file pone.0015922.s002.pdf]
